# Supplementary material
Source: Springer Nature journal article supplement (https://www.springermedizin.de/resource/supplementary/12916_2010_281_MOESM3_ESM.pdf/9599544)
Supplement: MOESM3 [file 9599544]

**Initial electronic search**  
(conducted by one reviewer)  
MEDLINE, EMBASE,  
Current contents, AMED, Cochrane  
Central Register of Controlled Trials  
  
2690 non-duplicate papers

**Screening of titles & abstracts**  
(independently conducted  
by two reviewers)

42 papers retrieved  
(including 2 papers identified  
by citation tracking)

**Review of retrieved papers**  
(independently conducted by  
two reviewers)

4 controlled trials  
met the inclusion criteria

**Data extraction and  
quality assessment**  
(independently conducted by  
two reviewers)

**Reasons for exclusion**  
Not a controlled trial = 1  
Not a study of NSLBP = 1  
Targeted treatment versus no treatment = 1  
Targeted versus targeted treatment = 1  
Not an effect modifier RCT or multi-arm  
subgroup-system RCT = 8  
No relevant outcome measures = 1  
No relevant intervention = 1  
No a priori clinical reasoning = 9  
More than 15% with neurological signs = 3  
Hypothesis-generating,  
not hypothesis-testing study = 2  
Effects of manual therapy, traction or  
exercise not reported independently  
of other treatments = 2  
Cross-over trial, effect size diluted = 1  
Baseline-scores are not similar  
between groups = 3  
(papers could be excluded for  
more than one reason)
